# Supplementary figures and images for: Alcohol narrows physical distance between strangers
Source: PubMed Central journal article supplement — Proc Natl Acad Sci U S A. 2021 May 10;118(20):e2101937118. doi: 10.1073/pnas.2101937118 (PMC8157913; doi:10.1073/pnas.2101937118), 2021-05-10

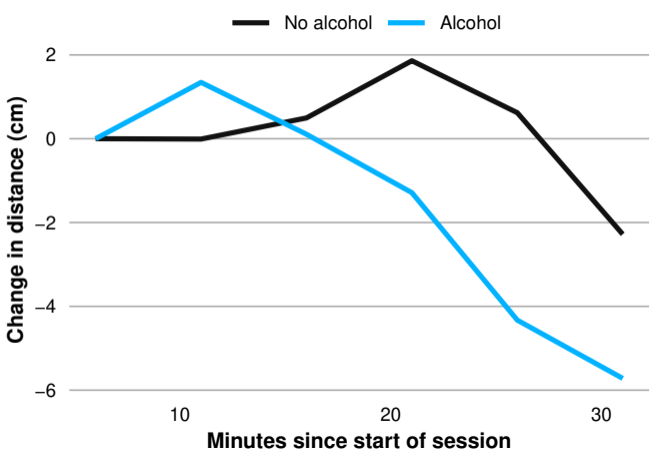

Supplement: pnas.2101937118.sd06.pdf [file pnas.2101937118.sd06.pdf]
